# Supplementary material for: Multi-functional smart bulk hydrogel panels with strong near-infrared shielding and active local control
Source: Royal Society of Chemistry journal article supplement (doi:10.1039/d4mh01648c), 2025-01-01
Supplement: d4mh01648c1.pdf [file d4mh01648c1.pdf]

1

## 2 Supporting Information

3

### 4 Multi-functional smart bulk hydrogel panels with strong Near- 5 infrared shielding and active local control

6 *Yitong Ding<sup>a, b</sup>, Gang Li<sup>c</sup>, Keunhyuk Ryu<sup>d</sup>, JianGuo Guan<sup>c</sup>, Shancheng Wang<sup>d</sup>, Ying  
7 Xiong<sup>b, \*</sup>, Shaoyun Guo<sup>b</sup>, Yi Long<sup>d, \*</sup>*

8 <sup>a</sup> Key Laboratory of Biobased Polymer Materials, Shandong Provincial Education  
9 Department, College of Polymer Science and Engineering, Qingdao University of  
10 Science and Technology, Qingdao, China.

11 <sup>b</sup> State Key Laboratory of Polymer Materials Engineering, Sichuan Provincial  
12 Engineering Laboratory of Plastic/Rubber Complex Processing Technology, Polymer  
13 Research Institute of Sichuan University, Chengdu 610065, China.

14 <sup>c</sup> State Key Laboratory of Advanced Technology for Materials Synthesis and  
15 Processing, International School of Materials Science and Engineering, Wuhan  
16 University of Technology, Wuhan 430070, China.

17 <sup>d</sup> Department of Electronic Engineering, The Chinese University of Hong Kong, Shatin,  
18 New Territories, Hong Kong SAR 999077, China.

19

---

\* Corresponding author. Email: [xiongying@scu.edu.cn](mailto:xiongying@scu.edu.cn) (Ying Xiong).

\* Corresponding author. Email: [yilong@cuhk.edu.hk](mailto:yilong@cuhk.edu.hk) (Yi Long).

## 20 Experimental Section

### 21 Characterization

22 The UV-Vis-NIR spectra for the sample were measured with the UV-Vis-NIR  
23 spectrophotometer system with the integration sphere attached (Avantes AvaSpec-  
24 ULS2048L StarLine Versatile Fiber-optic Spectrometer and AvaSpec-NIR256-2.5-  
25 HSC-EVO). The spectrophotometer is equipped with a heating and cooling stage  
26 (Linkam PE120) to control the sample temperature. The luminous ( $T_{lum}$ , 380-780 nm),  
27 NIR ( $T_{NIR}$ , 780-2500 nm), solar ( $T_{sol}$ , 280-2500 nm) transmittance and the luminous (  
28  $R_{lum}$ , 380-780 nm), NIR ( $R_{NIR}$ , 780-2500 nm), solar ( $R_{sol}$ , 280-2500 nm) reflectance  
29 were calculated using the method in the published work (Equation S1 and Equation S2)  
30 <sup>1,2</sup>.

$$31 \quad T_{lum/NIR/sol} = \frac{\int \varphi_{lum/IR/sol}(\lambda)T(\lambda)d\lambda}{\int \varphi_{lum/IR/sol}(\lambda)d\lambda} \quad (1)$$

$$32 \quad R_{lum/NIR/sol} = \frac{\int \varphi_{lum/IR/sol}(\lambda)R(\lambda)d\lambda}{\int \varphi_{lum/IR/sol}(\lambda)d\lambda} \quad (2)$$

33 Wherein,  $T(\lambda)$  and  $R(\lambda)$  denoted the spectral transmittance and reflectance,  $\varphi_{lum}$  is  
34 the standard luminous efficiency function of photopic vision in the wavelength range  
35 of 380-780 nm, and  $\varphi_{IR/solar}$  is the IR/solar irradiance spectra for air mass 1.5.

36 Scanning electron microscopy (SEM, JSM5900LV, Japan Electronics Co., Ltd.) and  
37 nano-measurer software were used to observe and analyze the microscopic morphology  
38 of photothermal films and post-phase transition gels (equilibrated at 60 °C for 15 min,

39 rapidly cooled in liquid nitrogen and freeze-dried for 12 h). X-Ray Spectroscopy (EDS)  
 40 was used to characterize the species and distribution of elements on the surface of the  
 41 photothermal films.

42 An infrared thermal imaging camera (Flir T620) was used to determine the near-  
 43 infrared photothermal capabilities of different photothermal films and gel panels. The  
 44 thermal imaging camera and laser were placed on the same side of the samples, and the  
 45 photothermal capacity of the photothermal film and gel panels were recorded at  
 46 different powers. Meanwhile, the laser power meter was placed on the other side of the  
 47 samples to compare the dynamic modulation of modified gel panels in different phase  
 48 transition states.

49 The relative transmittance of different modified gels was measured in real-time using  
 50 a spectrometer (MAYA, Ocean optics, USA).

51 The emissivity curve of 2.5-25  $\mu\text{m}$  was collected on an FTIR spectrometer (Perkin  
 52 Elmer Frontier) with an integrating sphere attached<sup>3,4</sup>.

53 
$$\varepsilon(T,\lambda) = A(T,\lambda) = 1 - T(T,\lambda) - R(T,\lambda) \quad (3)$$

54 
$$\varepsilon = \frac{\int_{2.5 \mu\text{m}}^{25 \mu\text{m}} I_{BB}(T,\lambda)\varepsilon(T,\lambda)d\lambda}{\int_{2.5 \mu\text{m}}^{25 \mu\text{m}} I_{BB}(T,\lambda)d\lambda} \quad (4)$$

55 
$$I_{BB}(T,\lambda) = \frac{2hc^2}{\lambda^5} * \frac{1}{e^{\frac{hc}{\lambda kT}} - 1} \quad (5)$$

56 Wherein,  $A(T,\lambda)$  is the absorbance of different hydrogel panels,  $I_{BB}(T,\lambda)$  is the

57 intensity of radiation from an ideal blackbody at temperature ( $T$ ) (Planck's law),  $h$  is  
58 Planck's constant,  $6.626 \times 10^{-34}$  m<sup>2</sup>·kg/s,  $c$  is the speed of light,  $2.998 \times 10^8$  m/s,  $k$  is the  
59 Boltzmann constant,  $1.380649 \times 10^{-23}$  J/K,  $e$  is the base of the natural logarithm,  
60 2.71828, and  $\lambda$  is the wavelength of light.

61 The images and videos of different gel panels were obtained using a Canon M5  
62 camera.

63 EnergyPlus software was used to simulate building energy consumption. A building  
64 model with the dimensions of 8 m in length, 6 m in width and 2.7 m in height was  
65 employed. And four windows with the dimension of 3 m in width and 2 m in height  
66 were installed in the four orientations to avoid the influence of orientation. The  
67 boundary conditions for heating and cooling were 18 °C and 26 °C, respectively. The  
68 optical properties of different windows were listed in Table S1. The hourly weather  
69 data for a Typical Meteorological Year (TMY) of Singapore and Bangkok were used  
70 in this simulation<sup>2</sup>.

71 The thermal transmission coefficient (U-value) and solar heat gain coefficient  
72 (SHGC-value) were calculated to compare the thermal and optical properties of  
73 different windows<sup>5,6</sup>.

$$74 \quad R = \frac{d}{\lambda} \quad (6)$$

$$75 \quad U = \frac{1}{R_i + R_e + \sum R_{be}} \quad (7)$$

76 Wherein,  $d$  is the thickness (Table S2),  $\lambda$  is the thermal conductivity,  $R$  is the thermal

77 resistance,  $R_i$  and  $R_e$  are thermal resistance of internal surface and external surface,  
78 respectively,  $R_{be}$  is the thermal resistance of the window components,  $U$  is the U-value  
79 (thermal transmission coefficient).

$$SHGC = \frac{\sum g_g * A_g + \sum g_f * A_f}{A_w} \quad (8)$$

81 Wherein,  $SHGC$  is the solar heat gain coefficient,  $g_g$  and  $g_f$  are the individual total  
82 solar transmittance values of the glass and frame respectively,  $A_g$  and  $A_f$  are the areas  
83 of glass and frame respectively,  $A_w$  is the window total area.

84

85

86

87

88

89

90

91

92

93

94

95

96

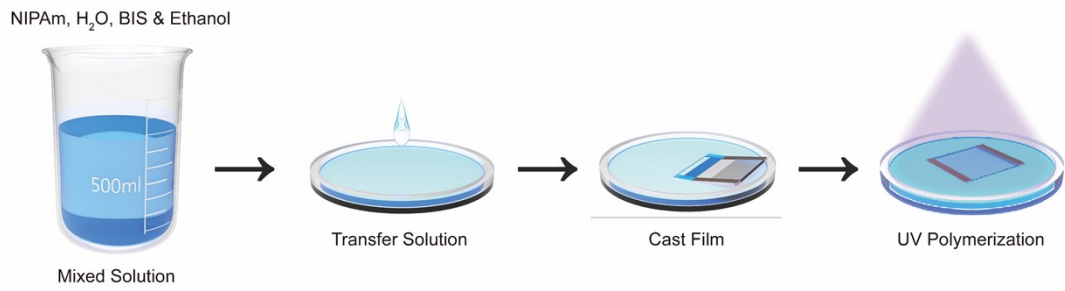

97

98 **Fig. S1.** Fabrication process of gel panels.

99

100

101

102

103

104

105

106

107

108

109

110

111

112

113

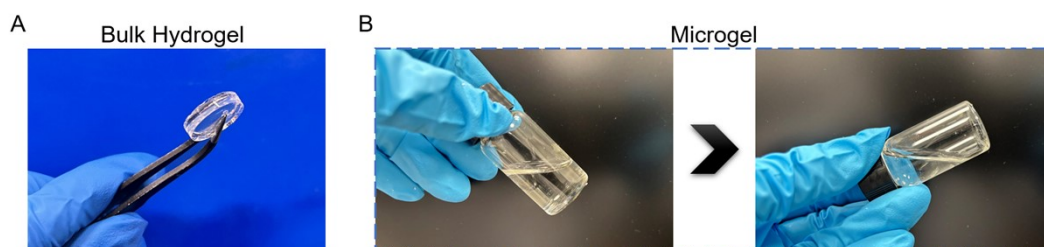

114

115 **Fig. S2.** Optical photographs of (A) bulk hydrogels and (B) microgel.

116

117

118

119

120

121

122

123

124

125

126

127

128

129

130

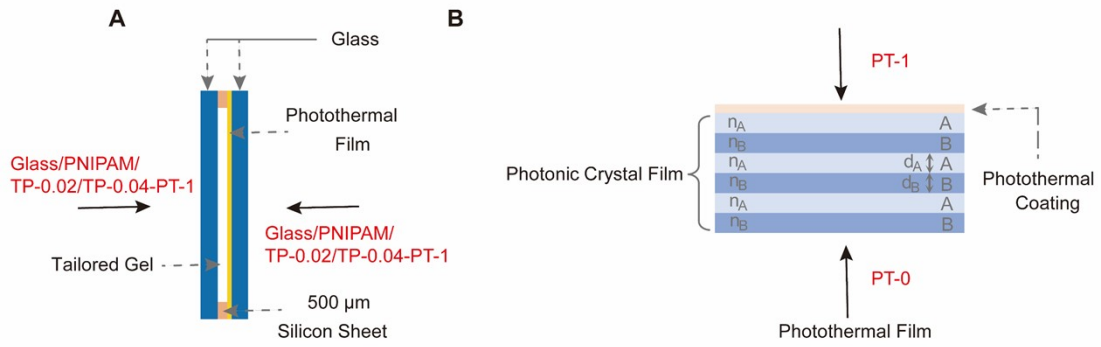

131

132 **Fig. S3.** (A) Schematic diagrams of the gel panels and (B) composite photothermal film  
 133 (PT film). "-0" and "-1" represent different surfaces of the photothermal film,  
 134 respectively. "-0" represent the direction of the photonic crystal layer. "-1" represent  
 135 direction of the photothermal coating.

136

137

138

139

140

141

142

143

144



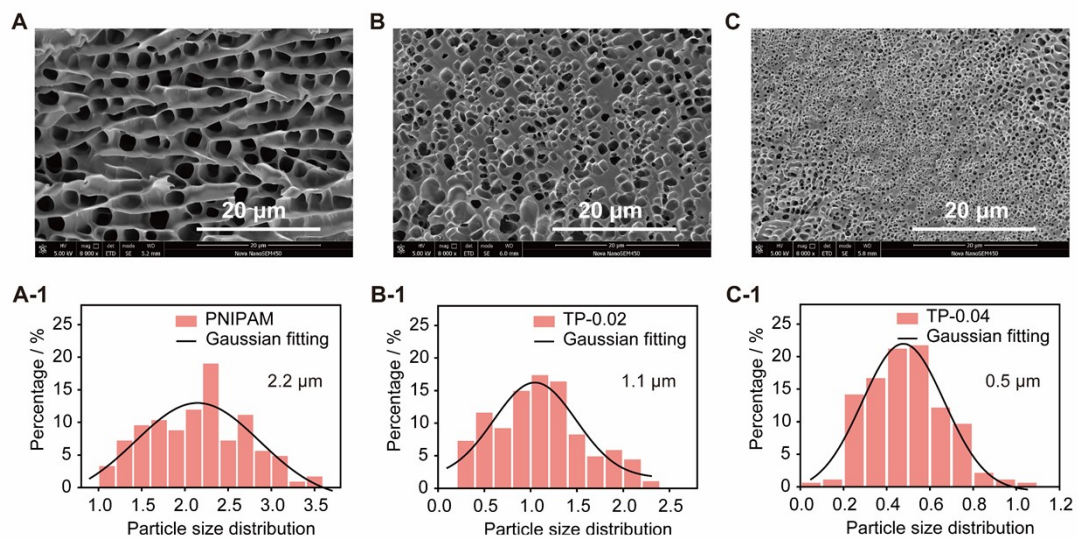

145

146 **Fig. S4.** The SEM (A-C) and the average pore size ((A-1)-(C-1)) of different samples

147 after phase transition (A, A-1) PNIPAM, (B, B-1) TP-0.02 and (C, C-1) TP-0.04.

148

149

150

151

152

153

154

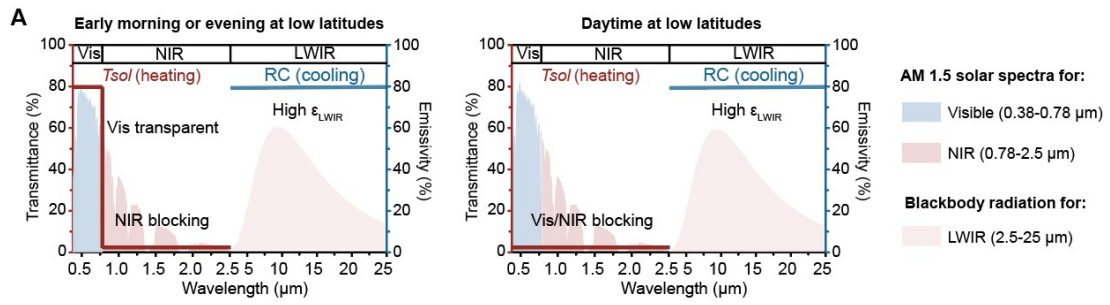

155

156 **Fig. S5.** Concept of the ideal energy-saving smart window at low latitudes.

157

158

159

160

161

162

163

164

165

166

167

168

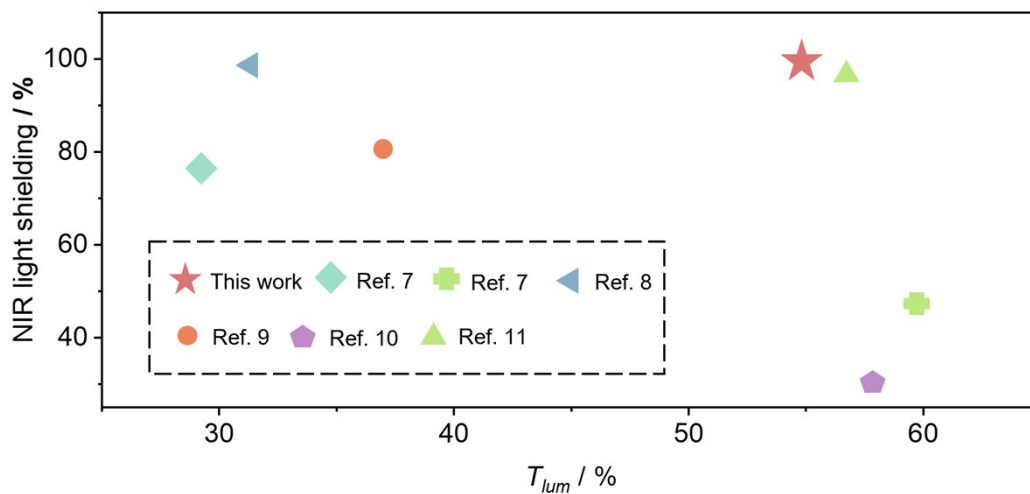

169

170 **Fig. S6.** Thermochromic performance (NIR light shielding and  $T_{lum}$ ) in some of the  
 171 best-reported smart materials<sup>7-11</sup>.

172

173

174

175

176

177

178

179

180

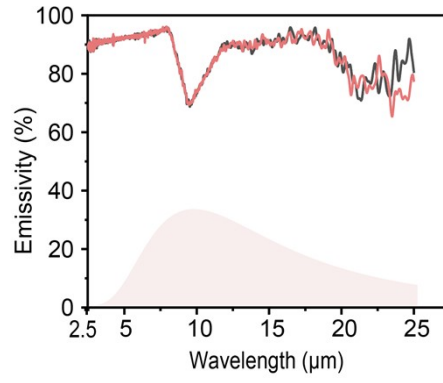

181

182 **Fig. S7.** LWIR emissivity curves of TP-0.04-PT smart window at different  
183 temperatures.

184

185

186

187

188

189

190

191

192

193

194

195

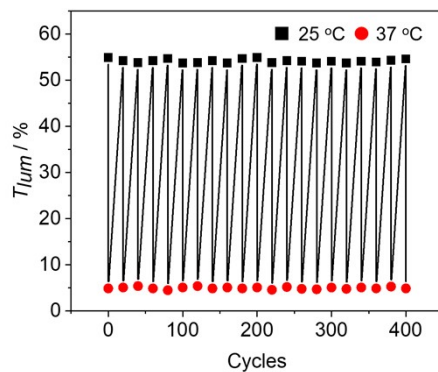

196

197 **Fig. S8.** The visible light transmittance ( $T_{lum}$ ) at 25 °C (Black) and 37 °C (Red)

198 measured after every 20 heating-cooling cycles.

199

200

201

202

203

204

205

206

207

208

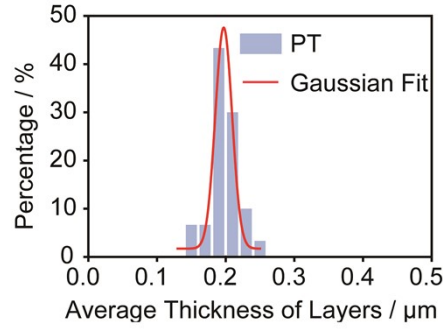

210

211 **Fig. S9.** Statistical analysis of average monolayer thickness ( $d$ ) of photothermal film  
 212 (PT film) (The difference between  $d_h$  and  $d_l$  is not significant, so it is assumed that  
 213  $d = d_h = d_l$ ).

214 The one-dimensional photonic crystal structure is a periodic nanostructure with a  
 215 refractive index distribution along one direction, resulting in the elegant optical  
 216 property called photonic band gap, which is defined as a waveband prohibiting light  
 217 propagation. In general, artificial one-dimensional photonic crystals consist of two  
 218 alternating materials. The calculation methods for the photonic band gap position (  
 219  $\lambda_{Bragg}$ ) and stop band width ( $W$ ) are given by Equations S9 and S10, respectively.

$$220 \quad m\lambda_{Bragg} = 2D\sqrt{n_{eff}^2 - \sin^2\theta} \quad (9)$$

$$221 \quad W = \frac{4|n_h - n_l|}{\pi|n_h + n_l|} \quad (10)$$

$$222 \quad D = d_h + d_l \quad (11)$$

$$223 \quad n_{eff} = (n_h d_h + n_l d_l) / (d_h + d_l) \quad (12)$$

224  $m$  is the diffraction order,  $\lambda_{Bragg}$  is the reflected light wavelength (photonic band gap

225 position),  $D$  is the total of the thicknesses of the two adjacent layers, about 380 nm (Fig.  
226 S9),  $n_{eff}$  is the effective refractive index of the photonic crystal film,  $\Theta$  is the incidence  
227 angle measured from the normal,  $W$  is the stop band width,  $d_h$  and  $d_l$  are the  
228 thicknesses of the two constituent layers, respectively,  $n_h$  and  $n_l$  are the refractive index  
229 of the two layers, respectively.

230 From Equations S9 and S10, it is evident that the theoretical  $\lambda_{Bragg}$  and  $W$  can be  
231 calculated when the values for the layer thickness ( $d_h$  and  $d_l$ ) and refractive index ( $n_h$   
232 and  $n_l$ ) of the one-dimensional photonic crystal structure are known. By analyzing the  
233 cross-sectional SEM of the photo-thermal films, we can calculate the average layer  
234 thickness ( $d$ ) of the one-dimensional photonic crystal structure (Fig. S9) (Assuming  
235  $d = d_h = d_l$ ). However, the refractive index of each layer cannot be fully determined,  
236 thus we cannot accurately calculate the theoretical  $\lambda_{Bragg}$  and  $W$ . Fortunately, the  
237 photonic crystal structure with a  $\lambda_{Bragg}$  of approximately 1050 nm and  $W$  of around  
238 300 nm can be achieved theoretically through methods such as designing a gradient in  
239 layer thickness or controlling the refractive index difference between layers.

240 Actually, the photothermal films are commercially available products that consist  
241 of an alternate stacked structure and surface photo-thermal components as indicated by  
242 SEM (Fig. 3A) and EDS (Fig. 3B) analyses. Moreover, this alternating laminated  
243 structure can selectively reflect light in the 850-1150 nm range and exhibits the  
244 characteristics of a one-dimensional photonic crystal (Fig. 3D). Therefore, the  
245 mechanism of photothermal thin films can be understood from the fact that photonic  
246 crystal structures selectively reflect light in the 850-1150 nm range toward the

247 photothermal component, thereby enhancing the efficiency of photothermal generation.

248

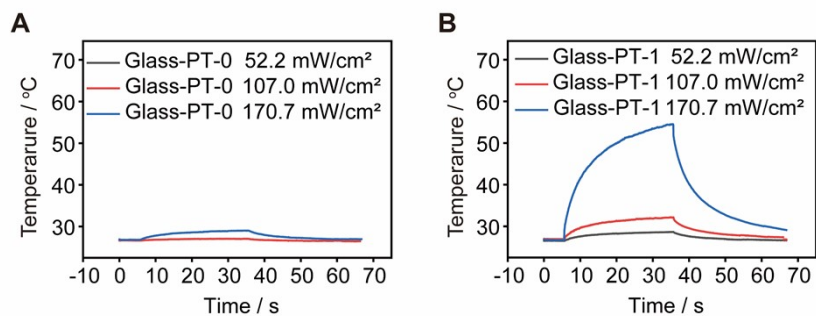

249

250 **Fig. S10.** The temperature change of different molds. "-0" and "-1" represent different  
251 surfaces of the photothermal film, respectively. "-0" represent the direction of the  
252 photonic crystal layer. "-1" represent direction of the photothermal coating.

253

254

255

256

257

258

259

260



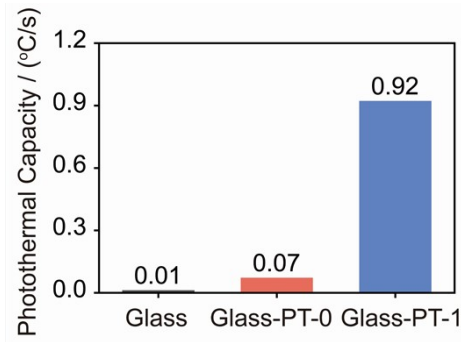

261

262 **Fig. S11.** The near-infrared (NIR) photothermal capability of Glass and Glass-PT  
263 molds. "-0" and "-1" represent different surfaces of the photothermal film, respectively.  
264 "-0" represent the direction of the photonic crystal layer. "-1" represent direction of the  
265 photothermal coating.

266

267

268

269

270

271

272

273

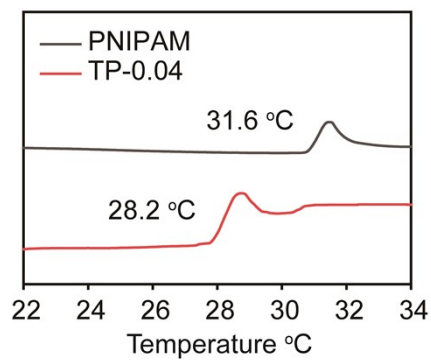

274

275 **Fig. S12.** DSC heating curves of PNIPAM gel.

276

277

278

279

280

281

282

283

284

285

286

287

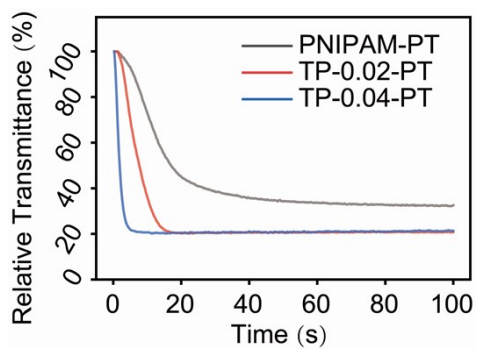

288

289 **Fig. S13.** The relative transmittance (550 nm) of hydrogel panels at 980 nm laser (170.7  
290 mW/cm<sup>2</sup>) response.

291

292

293

294

295

296

297

298

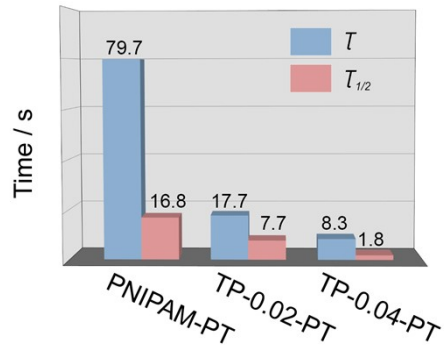

299

300 **Fig. S14.** The response speed of different smart hydrogel panels to 980 nm laser (170.7

301 mW/cm<sup>2</sup>).

302

303

304

305

306

307

308

309

310

311

312

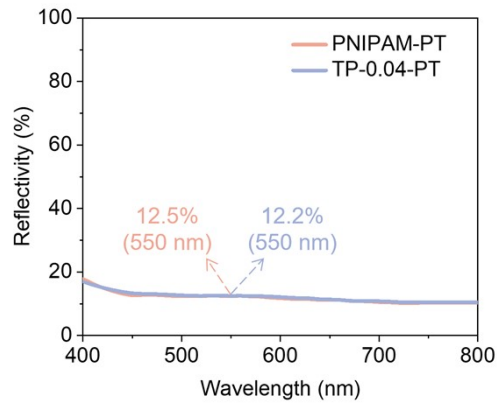

313

314 **Fig. S15.** The reflectivity (25 °C) of the hydrogel panels (380-780 nm).

315

316

317

318

319

320

321

322

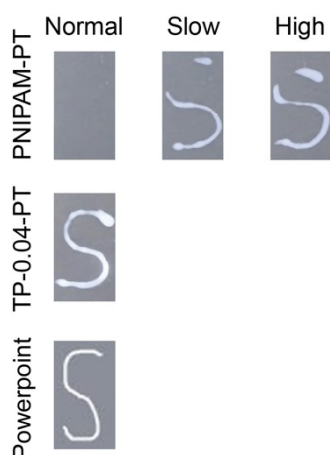

323

324 **Fig. S16.** Digital photos of different writing styles (-Normal (1.5 s/Byte, 640.1  
 325 mW/cm<sup>2</sup>), -Slow (6.0 s/Byte, 640.1 mW/cm<sup>2</sup>), -High (1.5 s/Byte, 853.8 mW/cm<sup>2</sup>)).

326 The real-time image of the hydrogel panels was captured using a digital camera  
 327 (Fig. S16). White (RGB: 255, 255, 255) lines were used to write the same letters in  
 328 Microsoft PowerPoint using the color of the hydrogel panel image (RGB: 139, 143,  
 329 153) as the background, and the colored image was captured using the screenshot  
 330 function of the Windows operating system. To quantitatively compare the clarity of the  
 331 two writing methods, the RGB values in the image were converted to grayscale values  
 332 using Equation S13.

333 A higher number of grayscale values indicates greater color richness in the image,  
 334 while a larger difference in grayscale values corresponds to higher contrast and greater  
 335 clarity of the writing. The clarity of writing in the two methods was quantitatively  
 336 compared using the Brenner gradient ( $D(f)$ ) and the sharpness difference between light  
 337 and dark regions ( $D(i)$ ) (Equation S14 and S17). The former reflects the cumulative  
 338 difference in pixel grayscale values between adjacent pixels, while the latter indicates  
 339 the difference in the average pixel grayscale values between the writing and non-writing

340 regions. Therefore, higher values of  $D(f)$  and  $D(i)$  can indicate clearer writing results.

341 
$$f(x, y) = 0.299R(x, y) + 0.587G(x, y) + 0.114B(x, y) \quad (13)$$

342 
$$D(f) = \sum_y \sum_x |f(x + 2, y) - f(x, y)|^2 \quad (14)$$

343 
$$D_1 = \frac{1}{N_1} \sum_{x=1}^{N_x} \sum_{y=1}^{N_y} f_1(x, y) \quad (15)$$

344 
$$D_2 = \frac{1}{N_2} \sum_{x=1}^{N_x} \sum_{y=1}^{N_y} f_2(x, y) \quad (16)$$

345 
$$D(i) = D_1 - D_2 \quad (17)$$

346 The grayscale value ( $f(x, y)$ ) of a pixel can be calculated from its red ( $R(x, y)$ ), green  
347 ( $G(x, y)$ ), and blue ( $B(x, y)$ ) values. Brenner gradient ( $D(f)$ ) is a fast edge detector  
348 which measures the difference between a pixel and its neighbor (Fig. S17).  $D(i)$  is the  
349 difference in sharpness between light and dark (Fig. S18);  $D_1$  and  $D_2$  are the average  
350 grayscale values of the light and dark regions, respectively;  $f_1(x, y)$  and  $f_2(x, y)$  are the  
351 grayscale values of the light and dark regions, respectively;  $N_1$  and  $N_2$  are the number  
352 of grayscale points of the light region and dark region, respectively;  $X_D$  is the grayscale  
353 differentiation value of the light and dark regions.  $X_D = 155$  was chosen to compare  
354 the writing clarity of different gel panels (Fig. 4E). The reason was that the writing  
355 background is uniform (PNIPAM-PT,  $D(i)=0$ ) at this time.

356

357

358

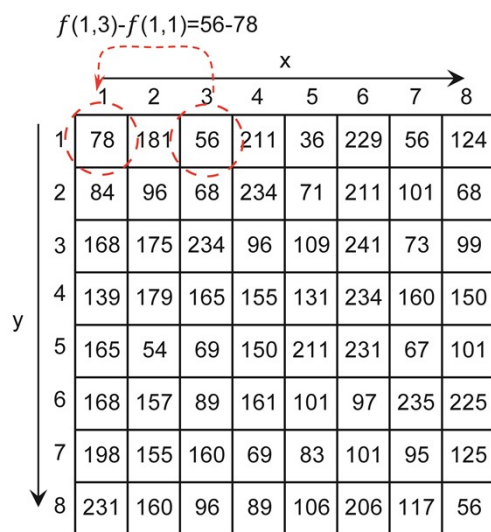

359

360 **Fig. S17.** Schematic diagram of the calculation of Brenner gradient ( $D(f)$ ).

361

362

363

364

365

366

367



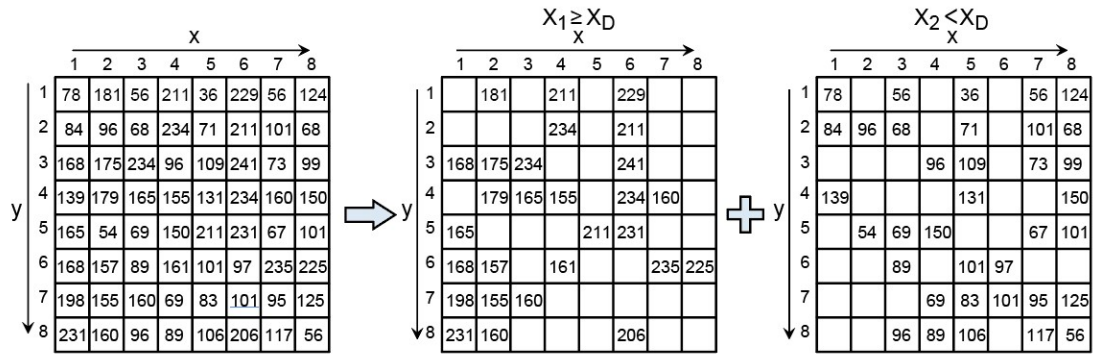

368

369 **Fig. S18.** Schematic diagram calculating sharpness difference between light and dark

370 regions ( $D(i)$ ).

371

372

373

374

375

376

377

378

379

380

381

382

383

384

385

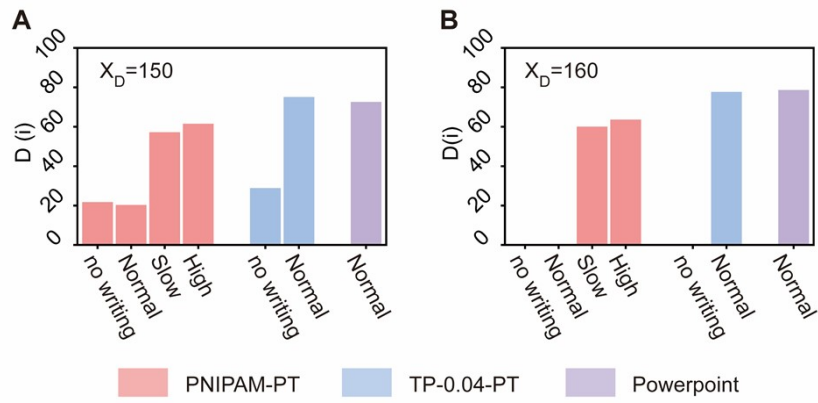

386

387 **Fig. S19.** The sharpness difference ( $D(i)$ ) of the gel panels using the different  $X_D$ .

388

389

390

391

392

393

394

395

396

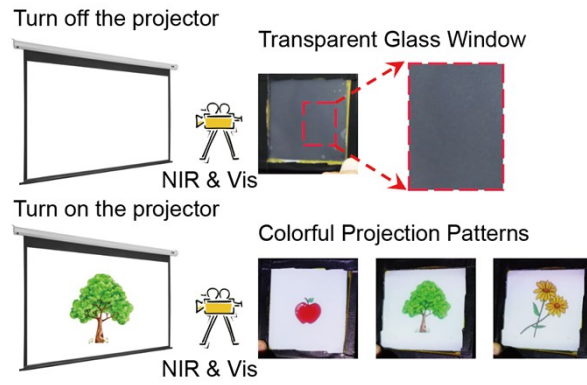

397

398 **Fig. S20.** Schematic diagrams and digital photos showing clear, colored images on  
399 smart windows.

400

401

402

403

404

405

406

407

408

409

410

411

412 **Table S1.** Optical properties for the samples used in building energy consumption  
 413 simulation.

|                         | <b>Glass</b> | <b>PNIPAM</b> | <b>PNIPAM-PT</b> | <b>TP-0.04-PT</b> |
|-------------------------|--------------|---------------|------------------|-------------------|
| $T_{sol}$ (%)           | 92.3 (25 °C) | 81.4 (25 °C)  | 31.7 (25 °C)     | 31.8 (25 °C)      |
|                         | 92.3 (37 °C) | 29.0 (37 °C)  | 5.3 (37 °C)      | 3.20 (37 °C)      |
| $R_{sol, Front}$<br>(%) | 6.0 (25 °C)  | 6.4 (25 °C)   | 13.2 (25 °C)     | 12.9 (25 °C)      |
|                         | 6.0 (37 °C)  | 32.9 (37 °C)  | 33.8 (37 °C)     | 41.1 (37 °C)      |
| $R_{sol, Back}$<br>(%)  | 6.0 (25 °C)  | 6.4 (25 °C)   | 22.0 (25 °C)     | 24.4 (25 °C)      |
|                         | 6.0 (37 °C)  | 32.9 (37 °C)  | 27.5 (37 °C)     | 28.2 (37 °C)      |
| $T_{lum}$ (%)           | 89.8 (25 °C) | 91.3 (25 °C)  | 54.8 (25 °C)     | 54.9 (25 °C)      |
|                         | 89.8 (37 °C) | 15.6 (37 °C)  | 7.3 (37 °C)      | 4.9 (37 °C)       |
| $R_{lum, Front}$<br>(%) | 7.1 (25 °C)  | 7.4 (25 °C)   | 12.2 (25 °C)     | 12.4 (25 °C)      |
|                         | 7.1 (37 °C)  | 46.0 (37 °C)  | 46.7 (37 °C)     | 53.5 (37 °C)      |
| $R_{lum, Back}$<br>(%)  | 7.1 (25 °C)  | 7.4 (25 °C)   | 9.0 (25 °C)      | 9.2 (25 °C)       |
|                         | 7.1 (37 °C)  | 46.0 (37 °C)  | 19.3 (37 °C)     | 19.4 (37 °C)      |
| $\tau_C$ (°C)           | --           | 32            | 32               | 28                |

414

415

416

417

418

419 **Table S2.** Thickness of the window components.

|            | Glass / (mm) | Gel / (mm) | TP / (mm) | Glass / (mm) |
|------------|--------------|------------|-----------|--------------|
| Glass      | 0.5          | --         | --        | --           |
| PNIPAM     | 0.5          | 0.5        | --        | 0.5          |
| PNIPAM-PT  | 0.5          | 0.5        | 0.075     | 0.5          |
| TP-0.04-PT | 0.5          | 0.5        | 0.075     | 0.5          |

420

421

422

423

424

425

426

427

428

429

430

431

432

433 **Table S3.** Thermochromic performance (NIR light shielding and  $T_{lum}$ ) in some of the  
434 best-reported smart materials<sup>7-11</sup>.

|           | $T_{lum}$ / (%) | Near-infrared Light Shielding / (%) |
|-----------|-----------------|-------------------------------------|
| This work | 55              | 99                                  |
| Ref. 7    | 30              | 76                                  |
|           | 60              | 47                                  |
| Ref. 8    | 31              | 99                                  |
| Ref. 9    | 37              | 80                                  |
| Ref. 10   | 58              | 30                                  |
| Ref. 11   | 57              | 97                                  |

435

436

437

438

439

440

441

442

443

## 444 References

- 445 1. X.-H. Li, C. Liu, S.-P. Feng and N. X. Fang, *Joule*, 2019, **3**, 290-302.
- 446 2. S. Wang, T. Jiang, Y. Meng, R. Yang, G. Tan and Y. Long, *Science*, 2021, **374**,  
447 1501-1504.
- 448 3. J. Liu, Y. Zhang, S. Li, C. Valenzuela, S. Shi, C. Jiang, S. Wu, L. Ye, L. Wang and  
449 Z. Zhou, *Chem. Eng. J.*, 2023, **453**, 139739.
- 450 4. S. Wang, Y. Zhou, T. Jiang, R. Yang, G. Tan and Y. Long, *Nano Energy*, 2021, **89**,  
451 106440.
- 452 5. N. A. Lantonio and M. Krarti, *Appl. Energ.*, 2022, **328**, 120239.
- 453 6. W. Meng, A. J. J. Kragt, Y. Gao, E. Brembilla, X. Hu, J. S. van der Burgt, A. P. H.  
454 J. Schenning, T. Klein, G. Zhou, E. R. van den Ham, L. Tan, L. Li, J. Wang and L.  
455 Jiang, *Adv. Mater.*, 2024, **36**, 2304910.
- 456 7. S. Deng, Q. Chang, D. Li, B. Wang, H. Jin and J. Li, *ACS Appl. Energ. Mater.*,  
457 2022, **5**, 3064-3071.
- 458 8. L. Zhang, Y. Du, H. Xia, F. xia, G. Yang and Y. Gao, *Ceram. Int.*, 2022, **48**,  
459 37122-37131.
- 460 9. J. Chen, G. Li, T. Jiang, S. Wang, H. Hu, Z. Bai, D. Shi, M. Chen, J. Guan, G.  
461 Tan and Y. Long, *Nano Energy*, 2024, **123**, 109386.
- 462 10. L. Yang, W. Z. Xu, G. Moula and P. A. Charpentier, *Catal. Today*, 2023, **407**,  
463 11-20.

464 11. L. Hu, C. Wang, H. Zhu, Y. Zhou, H. Li, L. Liu and L. Ma, *Small*, 2024, **20**,  
465 2306823.
